# Supplementary material for: “I am here because I wanted to shine”: how poetry can be used to better understand undergraduate students’ first-year chemistry or related course experiences
Source: Royal Society of Chemistry journal article supplement (doi:10.1039/d2rp00276k), 2023-01-01
Supplement: d2rp00276k1.pdf [file d2rp00276k1.pdf]

Supplementary Tables for Illingworth and Radhakrishnan, "I came here to escape": how poetry can be used to better understand undergraduate students' first-year chemistry or related course experiences"

Table S1: The code book that was used by Illingworth in the initial coding exercise, including a definition and an example for each code.

| Code              | Description                                                                                               | Example                                                                                                                                                     | Occurrences |
|-------------------|-----------------------------------------------------------------------------------------------------------|-------------------------------------------------------------------------------------------------------------------------------------------------------------|-------------|
| Collaboration     | Indicates that taking this course encouraged and enabled the student to collaborate with peers.           | As we break glass in fields and thrive in the progress made by others<br>For the future is ours and science is created with us altogether.<br><br>(Poem 16) | 8           |
| Prior uncertainty | Suggests that prior to taking this course the student was uncertain about the course / their own ability. | I came here to escape<br>From my house of horrors<br>One where science doesn't see my gender<br>As an explorer<br><br>(Poem 21)                             | 13          |

|                      |                                                                                                          |                                                                                                                                                                                                                                                                                   |          |
|----------------------|----------------------------------------------------------------------------------------------------------|-----------------------------------------------------------------------------------------------------------------------------------------------------------------------------------------------------------------------------------------------------------------------------------|----------|
| <p>Pastoral Care</p> | <p>The student indicated that they felt cared for / supported by their professors and/or classmates.</p> | <p>I was struck by how the professors cared not only about my academic questions but also about what made me, me.</p> <p>(Poem 1)</p>                                                                                                                                             | <p>8</p> |
| <p>Pride</p>         | <p>The student exhibits a sense of pride in taking the course.</p>                                       | <p>And at night, atop a pillow<br/>I gaze outside through a small window<br/>And to myself I proudly say<br/>I'm glad I went to [course name] today</p> <p>(Poem 15)</p> <p>Make it known<br/>With a smiley face in the margins<br/>joyfully scribbled notes</p> <p>(Poem 19)</p> | <p>9</p> |

|           |                                                                                           |                                                                                                    |    |
|-----------|-------------------------------------------------------------------------------------------|----------------------------------------------------------------------------------------------------|----|
| Rewarding | Taking this course was a rewarding experience for the student.                            | An exciting intellectual journey to embark<br>Working on it from sunset to dark<br><br>(Poem 4)    | 15 |
| Hard work | Taking this course involved hard work / cramming / intellectual involvement.              | The class that makes my brain twist<br>As we switch between Biology and Chemistry<br><br>(Poem 8)  | 24 |
| Community | A sense of community / friendship was developed amongst the student and their colleagues. | As I belonged<br>To a supportive community<br>Which provided me with opportunities<br><br>(Poem 2) | 22 |
| Fun       | Taking this course was fun.                                                               | But always full of pHun<br><br>(Poem 2)                                                            | 5  |

|                          |                                                                                           |                                                                                                                                                                                                                  |    |
|--------------------------|-------------------------------------------------------------------------------------------|------------------------------------------------------------------------------------------------------------------------------------------------------------------------------------------------------------------|----|
| Specific Concept         | Mentions a specific scientific concept that was learnt during this course.                | I learnt how to calculate Avogadro's constant<br>And understood how DNA ended up becoming a protein<br><br>(Poem 2)                                                                                              | 13 |
| Improvement in knowledge | Acknowledges that the student has improved their knowledge because of taking this course. | But this class has also given me proof to some of life's greatest truths:<br><br>(Poem 1)                                                                                                                        | 10 |
| Self-doubt               | Questions the student's ability, especially in relation to other classmates.              | Sometimes I feel I don't belong<br>I should learn to be less<br>My energy is just a sign of my unstableness<br><br>(Poem 5)<br><br>Doubts stir,<br>Thoughts whirl,<br>Imposter syndrome occurs.<br><br>(Poem 17) | 18 |

|          |                                                                                   |                                                                                                                                                                                                                                                  |    |
|----------|-----------------------------------------------------------------------------------|--------------------------------------------------------------------------------------------------------------------------------------------------------------------------------------------------------------------------------------------------|----|
| Identity | Lines that question identity of student and reflect on themselves as individuals. | <p>Maybe I'm not meant to live in a quantized state<br/>         Maybe I'm meant to go through the peaks and troughs<br/>         If we're all made up of waves<br/>         How can we ever have an identity that's static?</p> <p>(Poem 9)</p> | 14 |
|----------|-----------------------------------------------------------------------------------|--------------------------------------------------------------------------------------------------------------------------------------------------------------------------------------------------------------------------------------------------|----|

\* The number of occurrences is not limited to one per poem.

*Table S2: The code book that was used by Radhakrishnan in the initial coding exercise, including a definition and an example for each code.*

| <b>CODE</b> | <b>Description</b>                                                                           | <b>Example</b>                                                                                  | <b>Occurrences*</b> |
|-------------|----------------------------------------------------------------------------------------------|-------------------------------------------------------------------------------------------------|---------------------|
| Challenges  | The student mentioned a challenge or struggle within the course                              | But I've never struggled so badly<br>I've never tripped so roughly to the finish line (Poem 14) | 11                  |
| Good fit?   | The student asked or addressed questions about whether science was the right field for them. | I have pondered if I should quit.<br>Is STEM truly the right fit?<br><br>(Poem 29)              | 7                   |

|                       |                                                                                     |                                                                                                                                                 |    |
|-----------------------|-------------------------------------------------------------------------------------|-------------------------------------------------------------------------------------------------------------------------------------------------|----|
| Caring professors     | The student acknowledged support from the faculty                                   | I was struck by how the professors cared not only about my academic questions but also about what made me, me. (Poem 1)                         | 6  |
| Unfamiliar            | The student acknowledged new or unfamiliar experiences                              | I told my parents on a call "I've never taken a class like this one before." (Poem 1)                                                           | 8  |
| Community, friendship | The student mentioned making friends, lifelong friends, feeling part of a community | A tight and inclusive group, we truly wish well for each others' progress (Poem 25)                                                             | 19 |
| Collaboration, help   | The student talked about collaborating with peers                                   | science is created with us altogether (Poem 16)                                                                                                 | 9  |
| Late-night studying   | The student acknowledged putting in long hours/lots of effort outside of class      | Working on it from sunset to dark It's 4 A.M. but in Lulu I'm there (Poem 4)                                                                    | 8  |
| Triumph, pride        | The student describes successful feelings                                           | Strut with it<br>In and out of the lab<br>Or runway<br>Make it known<br>With a smiley face in the margins<br>joyfully scribbled notes (Poem 19) | 9  |

|                        |                                                                                               |                                                                                                                                           |    |
|------------------------|-----------------------------------------------------------------------------------------------|-------------------------------------------------------------------------------------------------------------------------------------------|----|
| Pain/frustration/      | The student describes negative emotions                                                       | I realized that studying without passion made me depressed (Poem 28)                                                                      | 17 |
| Belonging (or not)     | The student discusses or mentions questions of fitting in or belonging within the group/class | I belong here<br>No matter what paradoxes come in sight<br>Even blackholes<br>Won't stop my fight (Poem 21)                               | 15 |
| Confidence/nervousness | The student discusses or mentions ideas related to confidence or lack thereof                 | With regained confidence,<br>Assured we could achieve such feats (Poem 17)                                                                | 17 |
| Learning               | The student talks about academic learning and/or learning in general                          | Until<br>The golden glorious<br>Moment of scientific understanding<br>Eureka!<br>knowledge<br>is rightfully your at that moment (Poem 19) | 12 |
| Fun                    | The student mentions fun!                                                                     | I had so much fun learning about you... (Poem 8)                                                                                          | 5  |

|                                             |                                                                                                                           |                                                                                                                                                                      |    |
|---------------------------------------------|---------------------------------------------------------------------------------------------------------------------------|----------------------------------------------------------------------------------------------------------------------------------------------------------------------|----|
| Hopes for future/excitement for opportunity | The student expresses emotions related to anticipation, excitement, longing, or desired opportunities                     | I sat with anticipation on the first day of class<br>Ready to transfer this energy to maximize my performance<br>(Poem 3)                                            | 15 |
| Adjusting, uncertain                        | The student mentions that they are adjusting or uncertain during this class                                               | Since September, my life has been a transition state Where nothing feels permanent<br>(Poem 9)                                                                       | 8  |
| Confusion                                   | The student feels confused during the learning process.                                                                   | But I couldn't see shit for the most part<br>Sometimes I saw a few bursts of color and magic here and there<br>But I think those were merely lucky days<br>(Poem 14) | 9  |
| Stress                                      | The student expresses feelings of stress.                                                                                 | While the course made me very stressed...<br>(Poem 8)                                                                                                                | 5  |
| Formal Support                              | The student mentioned formal support structures in place for the course, such as supplemental instruction or office hours | Walking at night coming back from SI<br>I just got answers to my questions "why"<br>(Poem 4)                                                                         | 8  |



|                            |                                                                                 |                                                                                                                                                        |   |
|----------------------------|---------------------------------------------------------------------------------|--------------------------------------------------------------------------------------------------------------------------------------------------------|---|
| Stability,<br>instability  | The students referred to feeling stable or not.                                 | Am I truly stable-<br>the noble gas I wish?<br>(Poem 5)                                                                                                | 7 |
| Saturation/overw<br>helmed | The students expressed feelings of being overwhelmed                            | The current is strong,<br>Relentless with its prongs,<br>Leaving me gasping for air<br>(Poem 29)                                                       | 7 |
| identity                   | The student discusses questions of who they are and how that might change, etc. | I have so many different versions of myself in my head<br>They create resonance...<br>(Poem 9)                                                         | 8 |
| Worth it,<br>rewarding     | The student acknowledges that the class was worth it on balance or rewarding.   | ...I would not trade those hours...<br>(Poem 8)                                                                                                        | 5 |
| growing                    | The student alludes to growing in some way.                                     | Maybe this is a sign that i'm evolving Isn't that what I'm here for?/Maybe this is a sign that I'm moving towards<br>Equilibrium in myself<br>(Poem 9) | 6 |

|                                             |                                                                                  |                                                                                                                                                                               |   |
|---------------------------------------------|----------------------------------------------------------------------------------|-------------------------------------------------------------------------------------------------------------------------------------------------------------------------------|---|
| study or time management skills, scheduling | The student alludes to managing time and/or study strategies.                    | Coordinating schedules became a daily chore.<br>(Poem 13)                                                                                                                     | 5 |
| Routine, familiarity                        | The student finds comfort in the routine of the class and the familiarity of it. | The smile of recognition<br>Then trekking to science center<br>Through rain or shine<br>And walking up the same stairs to enter<br>The cement and glass building<br>(Poem 26) | 5 |
| perseverance                                | The student alludes to persevering throughout the course.                        | ...And her own determination and diligence...<br>(Poem 12)                                                                                                                    | 2 |
| competition                                 | The student finds competition                                                    | The competition has begun.<br><br>Between a select few<br>To come into view<br>And establish the hierarchy.<br>(Poem 17)                                                      | 2 |
| Admiration of peers                         | The student admires others in the course                                         | ...and I think it's truly a feat<br>That this class has so many student athletes<br>(Poem 7)                                                                                  | 2 |
| interdisciplinary                           | The student mentions how this class is interdisciplinary.                        | ...to experience interdisciplinary learning<br>(Poem 1)                                                                                                                       | 3 |

\* The number of occurrences is not limited to one per poem.
